1 **RUNNING TITLE:** *WSL5* for chloroplast biogenesis under cold stress

2 **Xi Liu • Jie Lan • Yunshuai Huang • Penghui Cao • Chunlei Zhou • Yaken Ren • Niqing He •**

3 **Shijia Liu • Yunlu Tian • Thanhliem Nguyen • Ling Jiang (✉) • Jianmin Wan (✉)**

4

5 ***WSL5*, a pentatricopeptide repeat protein, is essential for chloroplast biogenesis**

6 **in rice under cold stress**

7 **X. Liu<sup>1</sup> • J. Lan<sup>1</sup> • Y.S. Huang<sup>1</sup> • P.H. Cao<sup>1</sup> • C.L. Zhou<sup>1</sup> • Y.K. Ren<sup>1</sup> • N.Q. He<sup>1</sup> • S.J. Liu<sup>1</sup> • Y.L.**

8 **Tian<sup>1</sup> • T.L. Nguyen<sup>1</sup> • L.Jiang<sup>1</sup> (✉) • J.M. Wan<sup>1,2</sup> (✉)**

9 *1 State Key Laboratory for Crop Genetics and Germplasm Enhancement, Jiangsu Plant Gene*

10 *Engineering Research Center, Nanjing Agricultural University, Nanjing 210095, China.*

11 *2 National Key Facility for Crop Gene Resources and Genetic Improvement, Institute of Crop Science,*

12 *Chinese Academy of Agricultural Sciences, Beijing 100081, China*

13 \* Corresponding authors:

14 Ling Jiang

15 Telephone: +86-25-84399061

16 Fax: +86-25-84399061

17 E-mail: [jiangling@njau.edu.cn](mailto:jiangling@njau.edu.cn)

18 Jianmin Wan

19 Telephone: +86-25-84396516

20 Fax: +86-25-84396516

21 E-mail: [wanjm@njau.edu.cn](mailto:wanjm@njau.edu.cn)

22

23 **Abstract**

24 **Chloroplasts play an essential role in plant growth and development, and cold has a great effect**  
25 **on chloroplast development. Although many genes or regulators involved in chloroplast**  
26 **biogenesis and development have been isolated and characterized, identification of novel**  
27 **components associated with cold is still lacking. In this study, we reported the functional**  
28 **characterization of *white stripe leaf 5 (wsl5)* mutant in rice. The mutant developed white-striped**  
29 **leaves during early leaf development and was albinic when planted under cold stress. Genetic and**  
30 **molecular analysis revealed that WSL5 encodes a novel chloroplast-targeted pentatricopeptide**  
31 **repeat protein. RNA-seq analysis showed that expression of nuclear-encoded photosynthetic**  
32 **genes in the mutant was significantly repressed, and expression of many chloroplast-encoded**  
33 **genes was also significantly changed. Notably, the WSL5 mutation caused defects in editing of**  
34 ***rpl2* and *atpA*, and in splicing of *rpl2* and *rps12*. Chloroplast ribosome biogenesis was impaired**  
35 **under cold stress. We propose that WSL5 is required for normal chloroplast development in rice**  
36 **under cold stress.**

37

38 **Key words:** chloroplast biogenesis, cold stress, *Oryza sativa*, RNA-seq, RNA splicing, WSL5.

39

## 40 **Introduction**

41 Cold is an important environmental factor affecting chloroplast development and growth in juvenile  
42 plants and sudden low-temperature periods that often occur during early seedling development in  
43 spring can directly affect production (Kusumi and Iba, 2014). Rice seedlings are susceptible to cold  
44 stress with an impact that ultimately affects grain yield (Liu *et al.* 2013). Therefore, cold stress is a  
45 common problem that affects grain production, and rice varieties with increased cold tolerance are  
46 preferred (Zhao *et al.* 2017). Many studies have suggested that plants can regulate early chloroplast  
47 development under cold stress. In certain virescent mutants the chlorophyll content in young leaves is  
48 low, but gradually increases to normal levels as they develop (Yoo *et al.* 2009). Temperature-sensitive  
49 virescent mutants were used to study mechanisms regulating chloroplast development in seedlings  
50 under cold stress conditions, and many genes were identified, such as *V3*, *St1*, *OsV4*, *TCD9* and *TSV*  
51 (Yoo *et al.* 2009; Gong *et al.* 2014; Jiang *et al.* 2014; Sun *et al.* 2017). However, the mechanisms of  
52 chloroplast development in rice seedlings under cold stress remain poorly understood.

53 Chloroplasts are essential for photosynthesis and have crucial roles in plant development and growth  
54 by fixation of CO<sub>2</sub> and biosynthesis of carbon skeletons as well as other physiological processes (Jarvis  
55 and López-Juez, 2013). Formation of a photosynthetically active chloroplast from a proplastid is  
56 controlled by both nucleus-encoded polymerase (NEP) and plastid-encoded polymerase (PEP) and is  
57 accompanied by rapid development of the thylakoid membrane (Yu *et al.* 2014). NEP is a simple  
58 protein that is responsible for transcription of genes encoding plastidic PEP subunits, ribosomal  
59 proteins, and other plastidic “housekeeping” proteins (Liere *et al.* 2011). PEP, on the other hand, is a  
60 large, complex protein with many transiently attached peripheral subunits that participate in  
61 photosynthesis at the later stages of chloroplast development (Yu *et al.* 2014).

62 Chloroplast RNAs need to be processed to become functional rRNAs and mRNAs. Many of the  
63 processing factors for RNA cleavage, splicing, editing and stability are RNA-binding proteins (Tillich  
64 and Krause, 2010). All are coded by the nuclear genome. One family of RNA-binding proteins has  
65 pentatricopeptide repeats (PPR) and usually carries out specific RNA processing in chloroplasts, a  
66 feature first recognized from the *Arabidopsis thaliana* genome sequence (Stern *et al.* 2010; Shikanai  
67 and Fujii, 2013). PPR proteins are defined by a tandem array of a PPR motif consisting of 35 amino  
68 acids. In higher plants, the PPR family contains many members, with 450 in *Arabidopsis* and 655 in  
69 rice (O’Toole *et al.* 2008). The functions of PPR proteins are well characterized (Stern *et al.* 2010;

70 [Shikanai and Fujii, 2013](#)). Chloroplast-targeted PPR proteins were characterized as being involved in  
71 regulating RNA splicing, RNA editing, RNA cleavage, RNA stability, and RNA translation during plant  
72 development and growth ([Yu et al. 2009](#); [Ichinose et al. 2012](#)). Several PPR genes in rice, such as *YSA*,  
73 *OsV4*, *WSL*, *ALS3*, *OspTAC2*, and *WSL4*, were reported to function in chloroplast biogenesis, RNA  
74 editing, RNA splicing and chloroplast development ([Su et al. 2012](#); [Gong et al. 2014](#); [Tan et al. 2014](#);  
75 [Lin et al. 2015](#); [Wang et al. 2016](#); [Wang et al. 2017](#)). A PPR mutant in rice, *ysa*, develops albinic leaves  
76 before the three leaf stage, but the plants gradually turn green and recover to normal green at the six  
77 leaf stage ([Su et al. 2012](#)). *WSL* encodes a rice PPR protein that targets the chloroplasts and plays an  
78 essential role in splicing the chloroplast transcript *rpl2* ([Tan et al. 2014](#)). The P-family PPR mutant  
79 *wsl4*, which exhibits white-striped leaves before the 5-leaf stage, has defective chloroplast RNA group  
80 II intron splicing ([Wang et al. 2017](#)). However, the functions, substrates and regulatory mechanisms of  
81 many PPR proteins in rice remain to be elucidated.

82 In this study, we isolated and characterized a rice mutant *wsl5* that develops white-striped leaves at  
83 the early seedling stage; *wsl5* is albinic at low temperatures. *WSL5* encodes a P-family PPR protein  
84 containing an RNA recognition motif at its N terminus and 15 PPR motifs at its C terminus. *WSL5*  
85 locates to chloroplasts and is essential for chloroplast ribosome biogenesis under cold stress. We  
86 showed that RNA editing sites of *rpl2* and *atpA* were not edited in the mutant and plastid-encoded  
87 genes *rpl2* and *rps12* were not efficiently spliced in the *wsl5* mutant. Our results provide insight into  
88 the function *WSL5* in rice chloroplast development under cold stress.

89

## 90 **Materials and methods**

### 91 *Plant materials and growth conditions*

92 The *ws15* mutant was selected from an ethyl methane sulfonate (EMS) mutagenesis mutant pool of the  
93 subspecies *indica* cultivar Nanjing 11. Seeds of the WT and *ws15* plants were grown in a growth  
94 chamber under 16 h of light/8 h of darkness at constant temperatures of 20, 25, and 30°C. The third  
95 leaves at about 10-days post planting were used for nearly all analyses. To map the *WSL5* locus, we  
96 constructed an F<sub>2</sub> population derived from a cross of the *ws15* mutant and Dongjin(*japonica*).

### 97 *Pigment determination and transmission electron microscopy*

98 Wild-type and *ws15* mutant seedlings were grown in the field. Fresh leaves were collected and used to  
99 determine chlorophyll contents using a spectrophotometer according to the method of Arnon (1949).  
100 Briefly, 0.2 g of leaf tissue were collected and marinated in 5 ml of 95% ethanol for 48 h in darkness.  
101 The supernatants were collected by centrifugation and were analysed with a DU 800 UV/Vis  
102 Spectrophotometer (Beckman Coulter) at 665, 649 and 470 nm, respectively.

103 Transmission electron microscopy was performed according to the method of Wang *et al.* (2016).  
104 Briefly, fresh leaves were collected and cut into small pieces, fixed in 2.5% glutaraldehyde in a  
105 phosphate buffer at 4°C for 4 h, further fixed in 1% OsO<sub>4</sub>, stained with uranyl acetate, dehydrated in an  
106 ethanol series, and finally embedded in Spurr's medium prior to ultrathin sectioning. The samples were  
107 observed using a Hitachi H-7650 transmission electron microscope.

### 108 *Map-based cloning and complementation of WSL5*

109 Genetic analysis was performed using an F<sub>2</sub> population (*ws15*/Nanjing11); 654 plants with the recessive  
110 mutant phenotype were used for genetic mapping. New SSR/Indel markers were developed based on  
111 the sequences of Nipponbare and 93-11(*indica*) genomes (<http://www.gramene.org/>). The *WSL5* locus  
112 was narrowed to a 180 kb region flanked by InDel markers Y18 and Y47 on the long arm of  
113 chromosome 4 (Table S2).

114 For complementation of the *ws15* mutation, a 2,706 bp WT CDS fragment and an ~2 kb upstream  
115 sequence were amplified from variety Nanjing 11. They were cloned into the binary vector  
116 pCAMBIA1390 to generate the vector pCAMBIA1390-*WSL5*. This vector was introduced into  
117 *Agrobacterium tumefaciens* strain EHA105, which was then used to infect *ws15* mutant calli.

### 118 *Sequence analysis*

119 Gene prediction and structure analysis were performed using the GRAMENE database  
120 ([www.gramene.org/](http://www.gramene.org/)). Homologous sequences of WSL5 were identified using the Blastp search  
121 program of the National Center for Biotechnology Information (NCBI, [www.ncbi.nlm.nih.gov/](http://www.ncbi.nlm.nih.gov/)).  
122 Multiple sequence alignments were conducted with DNAMAN.

#### 123 *Subcellular localization of WSL5 protein*

124 For subcellular localization of WSL5 protein in rice protoplasts, the coding sequence of WSL5 was  
125 amplified and inserted into the pAN580 vector. The cDNA fragments were PCR-amplified using primer  
126 pairs shown in [Table S2](#). Protoplasts were isolated from 10-day-old 9311 seedlings. Transient  
127 expression constructs were separately transformed into rice protoplasts and incubated in the darkness at  
128 28°C for 16 h before examination ([Chen et al. 2006](#)). GFP fluorescence was observed using a confocal  
129 laser scanning microscope (Zeiss LSM 780).

#### 130 *Quantitative RT-PCR analysis*

131 Total RNA was isolated using the RNA prep pure plant kit (TIANGEN, Beijing). First-strand cDNA  
132 was synthesized using random hexamer primers (TaKaRa) for chloroplast-encoded genes and  
133 oligo(dT)<sub>18</sub> (TaKaRa) for nuclear encoded genes, and reverse transcribed using Prime scriptase  
134 (TaKaRa). Real-time PCR (RT-PCR) was performed using an ABI 7500 real-time PCR system with  
135 SYBR Green MIX and three biological repeats. Primers used for RT-PCR are listed in [Table S2](#). The  
136 rice *Ubiquitin* gene was used as an internal control.

#### 137 *RNA analysis*

138 Total RNA was isolated from 10-d-old seedlings of wild type and *ws5* grown in C30 and C20  
139 conditions using the RNA prep pure plant kit grown in the field. RNA samples were diluted to 10  
140 ng/mL and analyzed by an Agilent 2100 bioanalyzer. The RNA 6000 Nano Total RNA Analysis Kit  
141 (Agilent) was used for analysis.

#### 142 *RNA editing sites and RNA splicing analysis*

143 Specific cDNA fragments were generated by RT-PCR amplification following established protocols  
144 ([Takenaka & Brennicke 2007](#)). The cDNA sequences were compared to identify C to T changes  
145 resulting from RNA editing. For RNA splicing analysis, the chloroplast gene with at least one intron  
146 was selected and amplified using RT-PCR with primers flanking the introns. The primers used for RNA  
147 editing and splicing analysis were obtained as reported previously ([Tan et al. 2014](#); [Zhang et al. 2017](#)).

#### 148 *Protein extraction, SDS-PAGE, and western blotting*

149 Leaf material was homogenized in lysis buffer (25 mM Tris-HCl, pH 7.6, 0.15 M NaCl, and 2%  
150 sodium dodecyl sulfate (SDS), 0.01% 2-mercaptoethanol). Sample amounts were standardized by fresh  
151 weight. The protein samples were separated by 10% SDS-polyacrylamide gel electrophoresis (PAGE).  
152 After electrophoresis, the proteins were transferred onto PVDF membranes (Millipore) and incubated  
153 with specific antibodies. Signals were detected using an ECL Plus Western Blotting Detection Kit  
154 (Thermo) and visualized by an imaging system (ChemiDocTMX- RS; Bio-Rad).

#### 155 *Yeast two-hybrid analysis*

156 The coding sequences of five rice MORFs were amplified with primers listed in [Zhang et al. \(2017\)](#),  
157 and then MORFs and WSL5 were cloned into the pGAD-T7 or pGBK-T7 vectors, respectively. Yeast  
158 two-hybrid analysis was performed using the Clontech ([Clontech, www.clontech.com](http://www.clontech.com)) two-hybrid  
159 system, following the manufacturer's instructions.

#### 160 *RNA-seq analysis*

161 Total RNA was extracted from 10-day-old wild type and *ws15* seedlings grown at different temperatures.  
162 mRNA was enriched from total RNA using oligo-(dT) primer and Ribo-Zero rRNA Removal Kits for  
163 chloroplast-encoded genes. cDNA was synthesized using random hexamer primers. The library was  
164 constructed and sequenced using an Illumina HiSeq 2000 ([TGS, Shenzhen](#)). Totals of 45 million  
165 reads of genes from wild type and 42 million from *ws15* were obtained. The significance of  
166 differentially expressed genes (DEGs) were determined by using  $|\log_2(\text{Fold Change})| > 1$  and  $q$   
167 values  $< 0.05$ . Gene Ontology (<http://www.geneontology.org/>) analyses were performed referring Goseq  
168 ([Young et al. 2010](#)). Pathway enrichment analysis was performed using the Kyoto Encyclopedia of  
169 Genes and Genomes database ([Kanehisa et al. 2008](#)).

170

171 **Results**

172 *Characterization of the wsl5 mutant*

173 To identify genetic factors regulating chloroplast development in rice, we used the *wsl5* mutant  
174 obtained in an EMS mutant pool of Nanjing 11(*indica*). Seedlings of *wsl5* exhibited a white-striped leaf  
175 phenotype up to the four-leaf stage under field conditions (Fig.1A, B). Normal green leaf development  
176 occurred thereafter. Chlorophyll and carotenoid contents in leaves of *wsl5* mutant were much lower  
177 than in wild type (WT) before the five-leaf stage, but were subsequently similar to the WT  
178 (Supplementary Fig. S1). Major agronomic traits of the *wsl5* mutant at maturity, such as plant height  
179 and seed size, were indistinguishable from those of WT plants (Fig. 1C and Supplementary Table S1).  
180 Chlorophyll (Chl a, Chl b) and carotenoid contents were reduced in *wsl5* mutant seedlings (Fig. 1D). To  
181 examine whether lack of photosynthetic structure was accompanied by ultrastructural changes in  
182 chloroplasts of *wsl5* mutant, we compared the ultrastructure of chloroplasts in white and green sectors  
183 of *wsl5* mutant leaves and normal WT leaves by transmission electron microscopy (TEM). Cells in WT  
184 leaves and green sectors in leaves of *wsl5* had normal chloroplasts displaying structured thylakoid  
185 membranes composed of grana connected by stroma lamellae (Fig.1E, H). However, the chloroplasts  
186 within the white sectors in the *wsl5* mutant were abnormal (Fig.1I, J). The results suggested that the  
187 *WSL5* had a role in chloroplast development in juvenile plants.

188 *The wsl5 phenotype was temperature-sensitive*

189 To verify whether the *wsl5* mutant was affected by temperature, *wsl5* and WT seedlings were produced  
190 in growth chambers under constant temperatures of 20°C, 25°C, 30°C (C20, C25, C30). Leaves of the  
191 *wsl5* mutant were albinic at 20°C (Fig. 2E) and the plants died. Chlorophyll (Chl) was not detectable in  
192 the leaves (Fig. 2F). At 25°C *wsl5* mutant developed leaves with white-stripes and chlorophyll was  
193 present at reduced levels relative to WT (Fig. 2C, D). At 30°C the mutant exhibited almost the same  
194 phenotype as the WT (Fig. 2A) and contained similar Chl contents (Fig. 2B). These results indicated  
195 that *wsl5* was sensitive to low temperatures and that *WSL5* protected chloroplast development from  
196 cold stress.

197 We also examined the ultrastructure of the chloroplasts in mesophyll cells of the WT and *wsl5* plants.  
198 At 30°C all WT and *wsl5* plants displayed normal chloroplasts with well-developed lamellar structures  
199 and with normally stacked grana and thylakoid membranes (Supplementary Fig. S2A-D). At 20°C, WT  
200 developed large starch grains and chloroplasts with normal thylakoids (Supplementary Fig.S2E, F),



201 whereas leaf cells from albinic sectors in *ws15* had no chloroplasts ([Supplementary Fig. S2G, H](#)). The  
202 results suggested that *WSL5* protected chloroplasts from damage caused by cold stress in wild-type  
203 seedlings.

#### 204 *Map-based cloning of the WSL5 allele*

205 Genetic analysis showed that the white stripe phenotype in the *ws15* mutants was controlled by a single  
206 recessive nuclear locus. To identify the location of the *WSL5* locus, 20 F<sub>2</sub> individuals with the mutant  
207 phenotype derived from a cross between *ws15* and Dongjin (*japonica*) were used. The *WSL5* locus was  
208 located to a 2.65 Mb region flanked by simple sequence repeat (SSR) markers RM8217 and RM559 on  
209 the long arm of chromosome 4. It was further delimited to a 180 kb region between indels Y17 and Y47  
210 using 654 F<sub>2</sub> plants with mutant phenotype. Twenty-two open reading frames (ORFs) were predicted in  
211 the region from published data (<http://www.gramene.org/>; [Fig. 3A](#)). Sequence analysis of the region  
212 showed that only one ORF encoding a pentatricopeptide repeat protein differed between WT and *ws15*  
213 ([Fig. 3B](#)). A SNP (T to C) located in the conserved region caused a leucine to proline amino acid  
214 substitution in the mutant ([Fig. 3B-C](#)).

215 To confirm that mutation of *WSL5* was responsible for the mutant phenotype, the *WSL5* coding  
216 region driven by the *UBQ* promoter was transformed into calli derived from *ws15* seeds. Twenty eight  
217 of 45 transgenic lines resistant to hygromycin and harboring the transgene displayed the wild-type  
218 phenotype ([Fig. 3D](#)). These results confirmed that *Os04g0684500* was the *WSL5* gene.

#### 219 *WSL5 encodes PPR protein*

220 Sequence analysis showed that *WSL5* comprised 12 exons and 11 introns. A single base substitution in  
221 the *ws15* mutant was located in the first exon ([Fig.3B](#)). A database search with Pfam  
222 (<http://pfam.xfam.org/search>) revealed that *WSL5* contained an RNA recognition motif at its N  
223 terminus and 15 PPR motifs at the C terminus thus belonging to the P family. The substituted amino  
224 acid (Leu) was highly conserved among the RNA recognition motif ([Fig. 3C](#)), suggesting an obligate  
225 role of this site for functional integrity of *WSL5* protein. *WSL5* shared a high degree of sequence  
226 similarity with maize PPR4 (84% identity) and *Arabidopsis thaliana* At5g04810 (59% identity)  
227 ([Supplementary Fig. S3](#)). Together, these results indicated that *WSL5* encodes a novel PPR protein.

#### 228 *Expression pattern and subcellular localization of WSL5*

229 Using Rice eFP Browser (<http://bar.utoronto.ca/efp/efpWeb.cgi>) we found that *WSL5* was  
230 expressed in all tissues, especially in young leaves. To verify these data, we examined the expression

231 levels of *WSL5* in different organs of WT by RT-PCR (Fig. 4A, B). The *WSL5* transcript was  
232 preferentially expressed in young leaves (Fig. 4B), suggesting that *WSL5* had an important role in  
233 chloroplast development in young seedlings. The *WSL5* transcripts were more abundant in plants  
234 grown at 20°C than at 30°C, indicating that *WSL5* was induced by low temperatures. Thus plants might  
235 express *WSL5* abundantly to regulate chloroplast development under cold stress (Fig. 4C).

236 To examine the actual subcellular localization of *WSL5*, a CaMV35S-driven construct with a  
237 *WSL5*-GFP fusion protein was generated using the pAN580 vector and transiently expressed in rice  
238 protoplasts. Green fluorescent signals of *WSL5*-GFP co-localized with the autofluorescent signals of  
239 chlorophyll (Fig. 4D), suggesting that *WSL5* localized to the chloroplasts. These results, together with  
240 chloroplast localization and the observed *wsl5* phenotypes, supported the notion that *WSL5* plays an  
241 important role in regulating chloroplast development in rice seedlings.

#### 242 *Expression of photosynthesis related-genes is down-regulated in wsl5*

243 RNA-seq was performed to analyze the effect of the *wsl5* mutation on gene expression. A total of 42  
244 million clean reads were obtained from wild type and *wsl5*. Compared to wild type, there were 1,699  
245 up-regulated genes and 1,999 down-regulated genes in *wsl5* (Fig. 5A-C and Supplementary Data S1).  
246 We randomly selected 5 down-regulated and 5 up-regulated genes to verify the results of RNA-seq. The  
247 qRT-PCR results were consistent with those from RNA-seq (Fig. 5D). GO and KEGG enrichment  
248 analysis indicated that genes encoding photosynthesis, light reaction, PSI and PSII, chloroplast  
249 thylakoid, ATP synthase, and carbon fixation had reduced expression in *wsl5* (Supplementary Fig. S5  
250 and S6). Also, some chlorophyll synthesis genes, including *HEMA*, *YGL8*, *PORA*, *CHLH*, *CRD1*, were  
251 significantly reduced, which was verified using real-time PCR (Supplementary Fig. S7).

#### 252 *wsl5 mutants have global defects in plastid gene expression*

253 To investigate whether the *WSL5* mutation affects transcription by PEP and NEP, we examined  
254 transcript abundance of various plastid genes in the *wsl5* mutant by RNA-seq. The expression levels of  
255 many plastidic genes differed between *wsl5* and wild type (Fig. 6). Compared with the wild type, the  
256 expressions of the plastid genes that are transcribed by PEP, including *psbA*, *psbB*, *psbD*, *petB*, *ndhA*,  
257 and *rbcL*, were strongly reduced in *wsl5* mutant. In addition, transcript levels of the plastid genes,  
258 including the ribosomal protein L32 (*rpl32*), *rpl14*, *rps2*, *rps4*, and *rpoA*, which are transcribed by NEP,  
259 were increased or unchanged in the mutant (Fig. 6). These results indicated that *WSL5* was required for  
260 optimal expression of plastid genes in rice seedlings.

261 *Analysis of transcripts and proteins of genes associated with chloroplast biogenesis in wsl5*

262 Since WSL5 was located in chloroplasts, we tested the accumulation of chloroplast proteins in *wsl5* and  
263 wild type using western-blot analysis under the C20 and C30 conditions. Under the C20 condition,  
264 protein levels in the large subunit of Rubisco (RbcL) and Rubisco activase (RCA) were much lower in  
265 *wsl5* (Fig. 7A). Other plastidic proteins including NADH dehydrogenase subunit 4, A1 of PSI, D1 of  
266 PSII, alpha subunit of RNA polymerase were tested. The results showed that the levels of  
267 plastid-encoded proteins were significantly decreased in *wsl5* (Fig. 7A). qRT-PCR results suggested the  
268 expression levels of class I genes *RbcL*, *psbA*, *psaA* were strikingly reduced, whereas expression of  
269 class III genes *rpoA* and *rpoC1*, and class II gene *AtpB*, was unchanged (Fig. 7B). When grown in C30  
270 conditions, transcripts and proteins of all genes in the mutant and WT showed very slight differences in  
271 expression pattern (Fig. 7C-D). These results indicated that WSL5 was required for protecting PEP  
272 activity under cold stress.

273 The chloroplast ribosome consists of a 50S large subunit and a 30S small subunit. Both subunits are  
274 comprised of rRNAs (23S, 16S, 5S, and 4.5S) and ribosomal proteins. We analyzed the composition  
275 and content of rRNAs using an Agilent 2100 bioanalyzer under C20 and C30 conditions. rRNA,  
276 including the 23S and 16S rRNAs, were decreased in *wsl5* seedlings under cold stress, but there was no  
277 difference under C30 conditions (Fig. 7E, F). These results clearly indicated severe defects in plastidic  
278 ribosome biogenesis in the *wsl5* mutant seedlings grown in cold conditions.

279 *The wsl5 mutant is defective in RNA editing and splicing of chloroplast group II introns*

280 PPR proteins are required for RNA editing, splicing, stability, maturation, and translation (Tan *et al.*  
281 2014; Hammani *et al.* 2016). Since WSL5 belongs to the P group, it was likely involved in  
282 transcript-processing activities. Firstly, we determined whether loss of WSL5 function affected editing  
283 at 21 identified RNA editing sites in chloroplast RNA (Corneille *et al.* 2000). The results showed that  
284 the editing efficiencies of *rpl2* at C1 and *atpA* at C1148 were significantly decreased in *wsl5* mutant  
285 compared to WT (Supplementary Fig.S8), whereas the other 10 genes and corresponding 19 editing  
286 sites were normally edited in *wsl5* mutant. We then analyzed the editing efficiencies of *rpl2* at C1 and  
287 *atpA* at C1148 in complemented transgenic plants. As expected, the editing efficiencies of *rpl2* at C1  
288 and *atpA* at C1148 were markedly improved in complemented plants (Supplementary Fig.S8). These  
289 data supported the contention that the mutation in WSL5 affected the editing efficiency of *rpl2* at C1  
290 and *atpA* at C1148.

291 In *Arabidopsis thaliana*, multiple organellar RNA editing factor (MORF) proteins have been  
292 implicated in RNA editing and provide the link between PPR proteins and the proteins contributing the  
293 enzymatic activity (Takenaka *et al.* 2012). Based on *Arabidopsis thaliana* MORF protein families  
294 (Zehrmann *et al.* 2015), we examined the potential interactions between rice MORF proteins and  
295 WSL5 by yeast two-hybrid analysis. The results showed that Os09g33480 and Os09g04670, both  
296 belonging to the *Arabidopsis thaliana* MORF8 branch (Zhang *et al.* 2017), strongly interacted with  
297 WSL5 protein in yeast (Fig.8). In contrast, Os04g51280, Os06g02600 and Os08g04450 did not interact  
298 with WSL5 (Fig.8). These results suggested that WSL5 may participate in RNA editing by interacting  
299 with *OsMORF8s*.

300 We tested whether WSL5 is involved in RNA splicing of chloroplast genes. The rice chloroplast  
301 genome contains 18 introns (17 group II introns and one group I intron) (Kaminaka *et al.* 1999). We  
302 amplified all chloroplast genes with at least one intron by RT-PCR using primers flanking the introns  
303 and compared the lengths of the amplified products between WT and *wsl5* mutant. Chloroplast  
304 transcripts *rpl2* and *rps12-2* were spliced at very low efficiency in *wsl5* compared to WT (Fig. 9, 10  
305 and Supplementary Fig. S9). To gain insight into the effects of the impaired splicing of *rpl2* and  
306 *rps12-2* on post-processing, we performed qRT-PCR to examine the expression of *rpl2* and *rps12* in  
307 *wsl5*. The *rpl2* and *rps12* transcript abundances were high in the mutant compared to WT (Fig. 10C, D).  
308 Thus, the low splicing efficiency of *rpl2* and *rps12-2* resulted in aberrant transcript accumulation in the  
309 *wsl5* mutant.

310 *Differentially expressed gene analysis in wsl5 and wild type under cold stress and normal*  
311 *conditions*

312 To investigate why phenotypic variation in *wsl5* mutants depends on temperature, we carried out  
313 differential gene expression analysis of *wsl5* and WT seedlings grown in growth cabinets at C20 and  
314 C30 by RNA-seq. mRNA was purified from total RNA isolated from the third leaves using poly-T  
315 oligo-attached magnetic beads; 6,491 overlapping genes were up or down-regulated between the two  
316 temperature treatments (Fig.11A, B and Supplementary Data S2). Go analysis indicated that genes  
317 involved in metabolic processes, oxidation-reduction processes, photosynthesis, light reaction, PSI and  
318 PSII, chloroplast thylakoid, ATP synthase, and carbon fixation were strongly reduced in the *wsl5*  
319 mutant at C20 (Fig. 11C). These results indicated that the WSL5 mutation led to change in many  
320 physiological processes under cold stress.

321 **Discussion**

322 *WSL5* encodes a chloroplast-targeted PPR protein that is essential for chloroplast development in  
323 juvenile plants under cold stress

324 PPR genes constitute a large multigene family in higher plants. PPR proteins are essential for plant  
325 growth and development and most of them are involved in RNA editing, splicing, and regulation of  
326 stability of various organellar transcripts (Barkan and Small, 2014). In contrast to PPRs in *Arabidopsis*  
327 *thaliana*, little is known about the functions of PPRs in rice. Here, we present a molecular  
328 characterization of PPR gene *WSL5* in rice. It has an RNA recognition motif and 15 PPR motifs  
329 (Supplementary Fig.S3). The *WSL5* protein was predicted to contain a chloroplast transit peptide (cTP)  
330 in its N-terminal region, suggesting that the protein is one of the PPRs targeted to chloroplasts, and this  
331 was confirmed by subcellular localization experiments (Fig. 4D). The disruption of *WSL5* protein  
332 under natural conditions led to abnormal chloroplasts and caused a variegated phenotype that affected  
333 both the chlorophyll content and the chloroplast ultrastructure up to the fourth leaf growth stage,  
334 whereas the *wsl5* mutant was albinic under cold stress (Fig. 2 and Supplementary Fig. S2). This  
335 finding suggests that the function of *WSL5* is essential for early chloroplast development under cold  
336 stress in rice. This conclusion is further supported by the results of expression analysis. *WSL5* was  
337 highly expressed in leaf section L3 and L4 at the seedling stage. A high level of *WSL5* was noted under  
338 low temperature. Sequence alignment of homologous proteins using *Arabidopsis thaliana*, maize and  
339 rice showed that the mutant site in *wsl5* is conserved within the RRM motif.

340 *WSL5* is involved in splicing of plastid genes and in ribosome biosynthesis

341 A large group of nuclear-encoded PPR proteins involved in RNA editing, splicing, stability, maturation,  
342 and translation is required chloroplast development (Tan *et al.* 2014; Wang *et al.* 2017). To date, six  
343 PPR proteins have been reported to be involved in RNA splicing of group II introns in chloroplasts.  
344 Among them, the maize PPR4 protein acts as an *rps12* trans-splicing factor (Schmitz-Linneweber *et al.*  
345 2006). *Arabidopsis thaliana* PPR protein OTP51 functions as a plastid *ycf3-2* intron cis-splicing factor  
346 and OTP70 has been implicated in splicing of the plastid transcript *rpoC1* (de Longevialle *et al.* 2008;  
347 Chateigner-Boutin *et al.* 2011). In this study, the *wsl5* mutant caused defects in splicing of *rpl2* and  
348 *rps12* (Figs. 9 and 10), implying that *WSL5* probably controls chloroplast RNA intron splicing during  
349 early leaf development in rice. This finding indicates that disruption of *rpl2* or *rps12*, either alone or in  
350 combination, may be responsible for the mutant phenotype.

351 Defective *rps12* and *rpl2* splicing could account for the white-stripe leaf phenotype and plastid  
352 ribosome deficiency in *ws15* mutant (Figs. 9 and 10). We analyzed the contents of rRNAs and  
353 ribosomal proteins; 23S and 16S rRNAs were decreased in *ws15* mutant under cold stress (Fig. 7E-F).  
354 The lack of mature *rps12* and *rpl2* mRNA in *ws15* mutants may severely affect ribosome functions in  
355 plastids. Thus, the ribosome assembly defect in *ws15* may also contribute to the *ws15* phenotype.

356 *Possible mechanism of WSL5 regulating chloroplast development under cold stress and normal*  
357 *conditions*

358 To study the molecular mechanism of *WSL5* in regulating chloroplast development under different  
359 temperature conditions we compared gene expression patterns in *ws15* mutant and wild type by  
360 RNA-seq analysis. Our findings showed that under cold stress *WSL5* regulates expression of genes,  
361 involved in carbohydrate metabolic processes, oxidation-reduction processes, photosynthesis,  
362 biosynthesis of secondary metabolites, chlorophyll biosynthesis process, and chloroplast development  
363 (Fig. 11 and Supplementary Data S2). Plastid thioredoxins are important for maintaining plastid  
364 oxidation-reduction balance (Bohrer *et al.* 2012). Many genes involved in regulating plastid  
365 oxidation-reduction balance are changed under the C20 and C30 conditions, such as *OsTRXm*, *OsTRXz*  
366 (Supplementary Fig. S10). *OsTRXm* is involved in regulation of activity of a target peroxiredoxin (Prx)  
367 through reduction of Cystic disulfide bridges (Chi *et al.* 2008). *OsTRXz* interacts with TSV to protect  
368 chloroplast development under cold stress (Sun *et al.* 2017). The large and small subunits of  
369 ribonucleotide reductase (RNR), V3 and St1 regulate the rate of deoxyribonucleotide production for  
370 DNA synthesis and repair (Yoo *et al.* 2009). V3 and *St1* are repressed under constant 20°C conditions in  
371 *ws15*, indicating that mutation in *WSL5* leads to defects in DNA synthesis and repair in juvenile plants  
372 at low temperatures (Supplementary Fig. S10). The expression levels of fatty acid metabolism genes  
373 *OsFAH1*, *OsFAH2*, and *OsFAD7*, and plastid starch metabolism genes *AGPS2b* and *PHO1*, were all  
374 dramatically changed in *ws15* compared with wild-type at low temperatures (Supplementary Fig. S10).  
375 These results indicate that *WSL5* is essential for chloroplast development under cold stress.

376 In conclusion, *WSL5* plays an important role in expression of plastid genes and biogenesis of plastid  
377 ribosomes, and is essential for chloroplast development in rice seedlings under cold stress by  
378 coordinated transcription and translation of chloroplast-associated genes. Identification of this new PPR  
379 protein will help to elucidate the molecular mechanisms of plastid development and ribosome  
380 biogenesis, and shed light on understanding chloroplast development in juvenile plants grown under

381 cold stress.

## 382 **Supplementary data**

383 Additional supplementary data may be found online for this article:

384 **Data S1** Genes differentially expressed in wild type and *ws15*.

385 **Data S2** Genes differentially expressed in wild type and *ws15* under different temperature  
386 conditions.

387 **Fig. S1.** Comparison of pigment contents from the second (L2), third (L3), fourth (L4) and  
388 fifth (L5) leaves of five-leaf-stage plants between WT and *ws15* mutant.

389 **Fig. S2.** Transmission electron microscopy images of cells from WT and *ws15* mutants grown  
390 under different temperature conditions.

391 **Fig. S3.** Alignment of *WSL5* orthologs in maize and *Arabidopsis*.

392 **Fig. S4.** *WSL5* was expressed in all tissues, especially during leaf development according to  
393 Rice eFP Browser.

394 **Fig. S5.** GO analysis of genes differentially expressed between wild type and *ws15*.

395 **Fig. S6.** Pathway analysis of genes differentially expressed between wild type and *ws15*.

396 **Fig. S7.** Expression levels of chlorophyll synthesis genes in wild type and *ws15*.

397 **Fig. S8.** Editing efficiencies of *rpl2* and *atpA* genes in WT and the *ws15* mutant.

398 **Fig. S9.** Quantitative RT-PCR analyses of *rpl2*, and *rps12* transcripts in WT and the *ws15*  
399 mutant.

400 **Fig. S10.** qRT-PCR analysis of genes differently expressed in RNA-seq.

401 **Table S1.** Comparison of agronomic traits between WT and *ws15* under field conditions.

402 **Table S2.** Primers used in this study.

## 403 **Acknowledgements**

404 This research was supported by Key Laboratory of Biology, Genetics and Breeding of Japonica Rice in  
405 Mid-lower Yangtze River, Ministry of Agriculture, P.R. China, and Jiangsu Collaborative Innovation  
406 Center for Modern Crop Production, and grants from The National Key Research and Development  
407 Program of China (2016YFD0101801, 2016YFD0100101-08), Jiangsu Science and Technology  
408 Development Program (BE2017368), Agricultural Science and Technology Innovation Fund project of  
409 Jiangsu Province(CX(16)1029) and Key Program of Science and Technology of Anhui Province

410 (16030701068).

## 411 **References**

412 **Arnon DI.** 1949. Copper enzymes in isolated chloroplasts. Polyphenoloxidase in *Beta vulgaris*. *Plant Physiology*  
413 **24**, 1-15.

414 **Barkan A, Small I.** 2014. Pentatricopeptide repeat proteins in plants. *Annual Review of Plant Biology* **65**,  
415 415-442.

416 **Bohrer AS, Massot V, Innocenti G, Reichheld JP, Issakidis-Bourguet E, Vanacker H.** 2012. New insights into  
417 the reduction systems of plastidial thioredoxins point out the unique properties of thioredoxin z from *Arabidopsis*.  
418 *Journal of Experimental Botany* **63**, 6315-6323.

419 **Chateigner-Boutin AL, des Francs-Small CC, Delannoy E, Kahlau S, Tanz SK, de Longevialle AF, Fujii S,**  
420 **Small I.** 2011. OTP70 is a pentatricopeptide repeat protein of the E subgroup involved in splicing of the plastid  
421 transcript *rpoCl*. *Plant Journal* **65**, 532-542.

422 **Chen S, Tao L, Zeng L, Vega-Sanchez ME, Umemura K, Wang GL.** 2006. A highly efficient transient  
423 protoplast system for analyzing defence gene expression and protein-protein interactions in rice. *Molecular Plant*  
424 *Pathology* **7**, 417-427.

425 **Chi YH, Moon JC, Park H, et al.** 2008. Abnormal chloroplast development and growth inhibition in rice  
426 thioredoxin m knock-down plants. *Plant Physiology* **148**, 808-817.

427 **Corneille S, Lutz K, Maliga P.** 2000. Conservation of RNA editing between rice and maize plastids: are most  
428 editing events dispensable? *Molecular Genetics and Genomics* **264**, 419-424.

429 **de Longevialle AF, Hendrickson L, Taylor NL, Delannoy E, Lurin C, Badger M, Millar AH, Small I.** 2008.  
430 The pentatricopeptide repeat gene *OTP51* with two LAGLIDADG motifs is required for the cis-splicing of plastid  
431 *yef3* intron 2 in *Arabidopsis thaliana*. *Plant Journal* **56**, 157-168.

432 **Gong X, Su Q, Lin D, Jiang Q, Xu J, Zhang J, Teng S, Dong Y.** 2014. The rice *OsV4* encoding a novel  
433 pentatricopeptide repeat protein is required for chloroplast development during the early leaf stage under cold  
434 stress. *Journal of Integrative Plant Biology* **56**, 400-410.

435 **Hammani K, Takenaka M, Miranda R, Barkan A.** 2016. A PPR protein in the PLS subfamily stabilizes the  
436 5'-end of processed *rpl16* mRNAs in maize chloroplasts. *Nucleic Acids Research* **44**, 4278-4288.

437 **Hedtke B, Borner T, Weihe A.** 1997. Mitochondrial and chloroplast phage-type RNA polymerases in *Arabidopsis*.  
438 *Science* **277**, 809-811.



- 439 **Ichinose M, Tasaki E, Sugita C, Sugita M.** 2012. A PPR-DYW protein is required for splicing of a group II  
440 intron of *coxI* pre-mRNA in *Physcomitrella patens*. *Plant Journal* **70**, 271-278.
- 441 **Jarvis P, López-Juez E.** 2013. Biogenesis and homeostasis of chloroplasts and other plastids. *Nature Review*  
442 *Molecular Cell Biology* **14**, 787-802.
- 443 **Jiang Q, Mei J, Gong XD, Xu JL, Zhang JH, Teng S, Lin DZ, Dong YJ.** 2014. Importance of the rice *TCD9*  
444 encoding  $\alpha$  subunit of chaperonin protein 60 (Cpn60 $\alpha$ ) for the chloroplast development during the early leaf stage.  
445 *Plant Science* **215-216**, 172-179.
- 446 **Kaminaka H, Morita S, Tokumoto M, Yokoyama H, Masumura T, Tanaka K.** 1999. Molecular cloning and  
447 characterization of a cDNA for an iron-superoxide dismutase in rice (*Oryza sativa* L.). *Bioscience. Biotechnology.*  
448 *Biochemistry* **63**, 302-308.
- 449 **Kanehisa M, Araki M, Goto S, et al.** 2008. KEGG for linking genomes to life and the environment. *Nucleic*  
450 *Acids Research* **36**, 480-484.
- 451 **Kusumi K, Iba K.** 2014. Establishment of the chloroplast genetic system in rice during early leaf development  
452 and at low temperatures. *Frontiers in Plant Science* **5**, 386.
- 453 **Liere K, Weihe A, Börner T.** 2011. The transcription machineries of plant mitochondria and chloroplasts:  
454 composition, function, and regulation. *Journal of Plant Physiology* **68**, 1345-1360.
- 455 **Lin D, Gong X, Jiang Q, Zheng K, Zhou H, Xu J, Teng S, Dong Y.** 2015. The rice *ALS3* encoding a novel  
456 pentatricopeptide repeat protein is required for chloroplast development and seedling growth. *Rice* **8**, 17.
- 457 **Liu F, Xu W, Song Q, Tan L, Liu J, Zhu Z, Fu Y, Su Z, Sun C.** 2013. Microarray assisted fine-mapping of  
458 quantitative trait loci for cold tolerance in rice. *Molecular Plant* **6**, 757-767.
- 459 **O'Toole N, Hattori M, Andres C, Iida K, Lurin C, Schmitz-Linneweber C, Sugita M, Small I.** 2008. On the  
460 expansion of the pentatricopeptide repeat gene family in plants. *Molecular Biology and Evolution* **25**, 1120-1128.
- 461 **Schmitz-Linnerweber C, Williams-Carrier Re, Kroeger TS, Vichas A, Barkan A.** 2006. A pentatricopeptide  
462 repeat protein facilitates the trans-splicing of the maize chloroplast *rps12* pre-mRNA. *Plant Cell* **18**, 2650-2663.
- 463 **Shikanai T, Fujii S.** 2013. Function of PPR proteins in plastid gene expression. *RNA Biology* **10**, 1446-1456.
- 464 **Stern DB, Goldschmidt-Clermont M, Hanson MR.** 2010. Chloroplast RNA metabolism. *Annual Review of*  
465 *Plant Biology* **61**, 125-155.
- 466 **Su N, Hu ML, Wu DX, et al.** 2012. Disruption of a rice pentatricopeptide repeat protein causes a seedling-specific  
467 albino phenotype and its utilization to enhance seed purity in hybrid rice production. *Plant Physiology* **159**,  
468 227-238.

- 469 **Sun J, Zheng T, Yu J, et al.** 2017. TSV, a putative plastidic oxidoreductase, protects rice chloroplasts from cold  
470 stress during development by interacting with plastidic thioredoxin Z. *New Phytologist* **215**, 240-255.
- 471 **Takenaka M, Brennicke A.** 2007. RNA editing in plant mitochondria: assays and biochemical approaches.  
472 *Methods in Enzymology* **424**, 439-458.
- 473 **Takenaka M, Zehrmann A, Verbitskiy D, Hartel B, Brennicke A.** 2013. RNA editing in plants and its evolution.  
474 *Annual Review of Genetics* **47**, 335-352.
- 475 **Takenaka M, Zehrmann A, Verbitskiy D, Kugelman M, Hartel B, Brennicke A.** 2012. Multiple organellar  
476 RNA editing factor (MORF) family proteins are required for RNA editing in mitochondria and plastids of plants.  
477 *Proceedings of the National Academy of Sciences of the United States of America* **109**, 5104-5109.
- 478 **Tan J, Tan A, Wu F, et al.** 2014. A novel chloroplast-localized pentatricopeptide repeat protein involved in  
479 splicing affects chloroplast development and abiotic stress response in rice. *Molecular Plant* **7**, 1329-1249.
- 480 **Tillich M, Krause K.** 2010. The ins and outs of editing and splicing of plastid RNAs: lessons from parasitic plants.  
481 *Nature Biotechnology* **27**, 256-266.
- 482 **Wang D, Liu H, Zhai G, Wang L, Shao J, Tao Y.** 2016. *OspTAC2* encodes a pentatricopeptide repeat protein and  
483 regulates rice chloroplast development. *Journal of Genetics and Genomics* **43**, 601-608.
- 484 **Wang Y, Ren Y, Zhou K, et al.** 2017. *WHITE STRIPE LEAF4* encodes a novel P-type PPR Protein required for  
485 chloroplast biogenesis during early leaf development. *Frontiers in Plant Science* doi:10.3389/fpls.2017.01116.
- 486 **Wang Y, Wang C, Zheng M, et al.** 2016. *WHITE PANICLE1*, a val-tRNA synthetase regulating chloroplast  
487 ribosome biogenesis in rice, is essential for early chloroplast development. *Plant Physiology* **170**, 2110-2123.
- 488 **Yoo SC, Cho SH, Sugimoto H, Li J, Kusumi K, Koh HJ, Iba K, Paek NC.** 2009. Rice *Virescent3* and *Stripe1*  
489 encoding the large and small subunits of ribonucleotide reductase are required for chloroplast biogenesis during  
490 early leaf development. *Plant Physiology* **50**, 388-401.
- 491 **Young MD, Wakefeld MJ, Smyth GK, Oshlack A.** 2010. Gene ontology analysis for RNA-seq: accounting for  
492 selection bias. *Genome Biology* **11**, R14.
- 493 **Yu Q.B, Huang C, Yang ZN.** 2014. Nuclear-encoded factors associated with the chloroplast transcription  
494 machinery of higher plants. *Frontiers in Plant Science* **5**, 316.
- 495 **Yu QB, Jiang Y, Chong K, Yang ZN.** 2009. *AtECB2*, a pentatricopeptide repeat protein, is required for  
496 chloroplast transcript *accD* RNA editing and early chloroplast biogenesis in *Arabidopsis thaliana*. *Plant Journal* **59**,  
497 1011-1023.

498 **Zehrmann A, Härtel B, Glass F, Bayer-Császár E, Obata T, Meyer E, Brennicke A, Takenak M.** 2015.  
499 Selective homo- and heteromer interactions between the multiple organellar RNA editing factor (MORF) proteins  
500 in *Arabidopsis thaliana*. *Journal of Biological Chemistry* **290**, 6445-6456.

501 **Zhang Z, Cui X, Wang Y, Wu J, Gu X, Lu T.** 2017. The RNA editing factor *WSP1* is essential for chloroplast  
502 development in rice. *Molecular Plant* **10**, 86-89.

503 **Zhao J, Zhang S, Dong J, Yang T, Mao X, Liu Q, Wang, X., Liu B.** 2017. A novel functional gene associated  
504 with cold tolerance at the seedling stage in rice. *Plant Biotechnology Journal* **15**, 1141-1148.

505  
506  
507  
508  
509  
510  
511  
512  
513  
514  
515  
516  
517  
518  
519  
520  
521  
522  
523  
524  
525  
526 \

527

528 **Figure Legends**

529 **Fig. 1.** Phenotypic characteristics of *ws15* mutant. (A-B) Phenotypes of WT and *ws15* mutant  
530 seedlings in the field 20 days after seeding. (C) Phenotypes of WT (left) and *ws15* (right) plants at  
531 maturity. (D) Leaf pigment contents of field-grown WT and *ws15* seedlings at 20 days after seeding.  
532 (E-F) Mesophyll cells in wild-type plants showing normal, well ordered chloroplasts. (G-H)  
533 Chloroplasts from green sectors of *ws15* seedlings were indistinguishable from those of WT. (I-J) Cells  
534 from white sectors of the mutants displayed abnormalities, including vacuolated plastids and lack of  
535 organized thylakoid membranes. Scale bar: 1 cm in (A-B), 10 cm in (C), 1  $\mu$ m in (E, G, I), 500 nm in  
536 (F, H, J). (Student's t-test,  $**P < 0.01$ ,  $*P < 0.05$ ).

537 **Fig. 2.** The *ws15* phenotype is temperature-sensitive. (A, C, E) Phenotypes of WT and *ws15*  
538 seedlings produced at different constant temperatures. C20, C25, and C30, refer to 20, 25, and 30°C  
539 respectively. (B, D, F) Leaf pigment contents of WT and *ws15* seedlings grown at different  
540 temperatures. (Student's t-test,  $*P < 0.05$ ,  $**P < 0.01$ ).

541 **Fig. 3.** Map-based cloning of the *WSL5* allele. (A) The *WSL5* locus was mapped to a 180 kb  
542 region between InDel markers Y17 and Y47, on chromosome 4L. Black arrows represent 22 putative  
543 genes in this region; candidate gene *WSL5* (*Os04g0684500*) is shown by a red arrow. (B) ATG and  
544 TGA represent the start and stop codons, respectively. Black boxes indicate the exons, and the white  
545 boxes indicate the 3'- and 5'- UTR. A SNP in the first exon in *WSL5* causes a leucine to proline amino  
546 acid substitution. (C) Alignment of amino acid sequences with highest identity to the *WSL5* protein.  
547 Red arrow indicates amino acid change. (D) Complementation of *ws15* by transformation.

548 **Fig. 4.** Expression pattern analysis and subcellular localization of *WSL5*. (A) Schematic of a rice  
549 seedling with fully expanded fourth leaf. (B) qRT-PCR analysis *WSL5* expression in roots, stems, L2,  
550 L3, L4, L5 and sheaths of wild type. (C) qRT-PCR analyses of *WSL5* transcript in WT and *ws15* mutant  
551 seedlings grown in a growth chamber with a 12 h photoperiod at 30, 25, and 20°C. (D) Localization of  
552 *WSL5* protein in rice protoplasts. Green fluorescence shows GFP, red fluorescence shows chlorophyll,  
553 orange indicates the two types of fluorescence merged. Error bars represent the SD from three  
554 independent experiments. (Student's t-test,  $**P < 0.01$ ).

555 **Fig. 5.** RNA-seq analysis of wild-type and *ws15* seedlings. mRNA was enriched from total RNA  
556 isolated from 10-d-old (third leaf) seedlings of wild type and *ws15* using oligo-(dT). cDNA was  
557 synthesized using random hexamer primers and reverse-transcribed using random hexamer primers.

558 The library was then constructed and sequenced using an Illumina HiSEquation 2000. (A) Frequencies  
559 of detected genes sorted according to expression levels. (B) Read numbers of wild-type and *ws15*  
560 sequences. (C) Volcano plot showing the overall alterations in gene expression in wild type and *ws15*.  
561 (D) qRT-PCR analysis of genes differentially expressed in RNA-seq. Five up-regulated and 5  
562 down-regulated genes were tested. Error bars represent SD from three independent experiments.  
563 (Student's t-test, \* $P < 0.05$ , \*\* $P < 0.01$ ).

564 **Fig. 6.** Differential expression of plastid-encoded genes in wild type and *ws15*. mRNA enriched  
565 from total RNA isolated from 10-d-old seedlings of wild type and *ws15* was fragmented and  
566 reverse-transcribed using random hexamer primers. The library was then constructed and sequenced  
567 using an Illumina HiSEquation 2000. The graph shows the  $\log_2$  ratio of transcript levels in *ws15* mutant  
568 compared with wild type.

569 **Fig. 7.** Analysis of accumulation of transcripts and proteins of representative genes associated  
570 with chloroplast biogenesis in WT and *ws15* seedlings. (A, C) Western blot analysis of chloroplast  
571 proteins and RCA in wild-type and *ws15* mutant seedlings at the third-leaf stage at C20 (A) and C30 (C).  
572 Hsp90 was used as an internal control. (B, D) qRT-PCR analysis of relative expression levels of  
573 plastidic encoding genes in wild type and *ws15* at the third-leaf stage under (B) C20 or (D) C30. Error  
574 bars represent SD from three independent experiments. (E-F) rRNA analysis using an Agilent 2100  
575 bioanalyzer. RNA was isolated from 10-d-old wild-type seedlings and *ws15* seedlings grown in C30 and  
576 C20. (Student's t-test, \*\* $P < 0.01$ ).

577 **Fig. 8.** Yeast two-hybrid assay of WSL5 and MORF families. WSL5 was fused to the pGBKT7  
578 vector (WSL5-BD). MORF protein was fused to the pGADT7 vector. LT, control medium  
579 (SD–Leu/–Trp); LTHA, selective medium (SD–Leu/–Trp/–His/–Ade). Empty pGBKT7 and  
580 pGAD-T7 vectors served as negative controls.

581 **Fig. 9.** Splicing analyses of chloroplast transcripts in WT and *ws15* mutant. Gene transcripts are  
582 labeled at the left. Spliced (S) and unspliced (U) transcripts are shown at the right. RNA was extracted  
583 from WT and *ws15* mutant seedlings.

584 **Fig. 10.** Splicing analyses of two chloroplast group II introns in WT and *ws15* mutant. (A) Sketch  
585 map of *rpl2* and *rps12* transcripts. (B) RT-PCR analyses of *rpl2* and *rps12* transcripts in WT and *ws15*  
586 mutant. (C-D) Quantitative RT-PCR analyses of *rpl2* and *rps12* transcripts in WT and *ws15* mutant  
587 seedlings. Data are means  $\pm$  SD of three repeats. Student's t-test: \*\* $P < 0.01$ .

588       **Fig. 11.** RNA-seq analysis of wild type and *ws15* under low temperature and normal conditions. (A)  
589 Up-regulated differentially expressed genes comparing W2 and M2 and W3 and M3. (B)  
590 Down-regulated differentially expressed genes between W2-vs-M2 and W3-vs-M3. (C) Go analysis of  
591 genes differentially expressed between W2 and M2 and W3 and M3. W3 and W2 represent wild type  
592 plants grown at 30°C and 20°C, respectively. M3 and M2 represent *ws15* plants grown at 30°C and  
593 20°C, respectively.

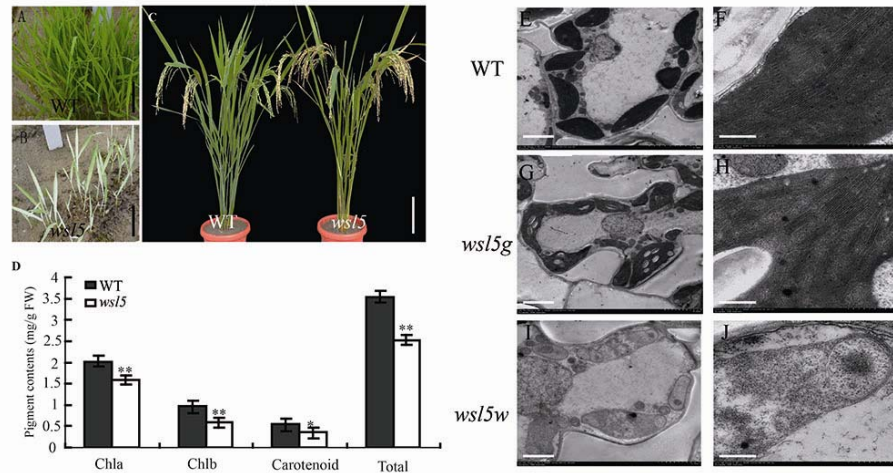

**Fig. 1.** Phenotypic characteristics of *ws15* mutant. (A-B) Phenotypes of WT and *ws15* mutant seedlings in the field 20 days after seeding. (C) Phenotypes of WT (left) and *ws15* (right) plants at maturity. (D) Leaf pigment contents of WT and *ws15* seedlings field-grown at 20 days after seeding. (E-F) Mesophyll cells in wild-type plants showing normal, well ordered chloroplasts. (G-H) Chloroplasts from green sectors of *ws15* seedlings were indistinguishable from those of WT. (I-J) Cells from white sectors of the mutants displayed abnormalities, including vacuolated plastids and lack of organized thylakoid membranes. Scale bar: 1 cm in (A-B), 10 cm in (C), 1 μm in (E, G, I), 500 nm in (F, H, J). (Student's t-test, \*\* $P < 0.01$ , \* $P < 0.05$ ).

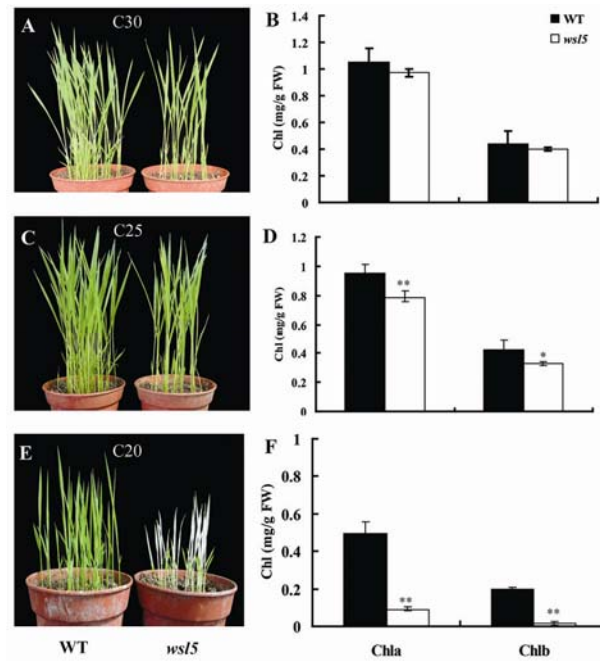

**Fig. 2.** The *ws15* phenotype is temperature-sensitive. (A, C, E) Phenotypes of WT and *ws15* seedlings produced at different constant temperatures. C20, C25, and C30, refer to 20, 25, and 30°C respectively. (B, D, F) Leaf pigment contents of WT and *ws15* seedlings grown at different temperatures. (Student's t-test, \* $P < 0.05$ , \*\* $P < 0.01$ ).



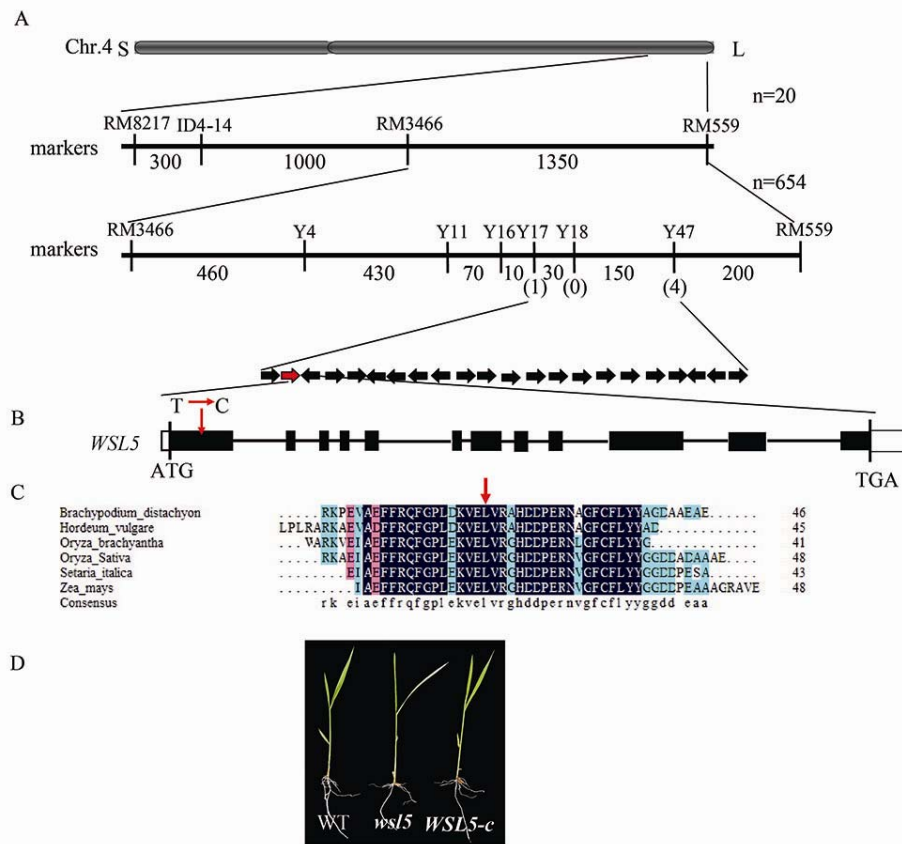

**Fig. 3.** Map-based cloning of the *WSL5* allele. (A) The *WSL5* locus was mapped to a 180 kb region between InDel markers Y17 and Y47, on chromosome 4L. Black arrows represent 22 putative genes in this region; candidate gene *WSL5* (*Os04g0684500*) is shown by a red arrow. (B) ATG and TGA represent the start and stop codons, respectively. Black boxes indicate the exons, and the white boxes indicate the 3'- and 5'- UTR. A SNP in the first exon in *WSL5* causes a leucine to proline amino acid substitution. (C) Alignment of amino acid sequences with highest identity to the *WSL5* protein. Red arrow indicates amino acid change. (D) Complementation of *ws15* by transformation.

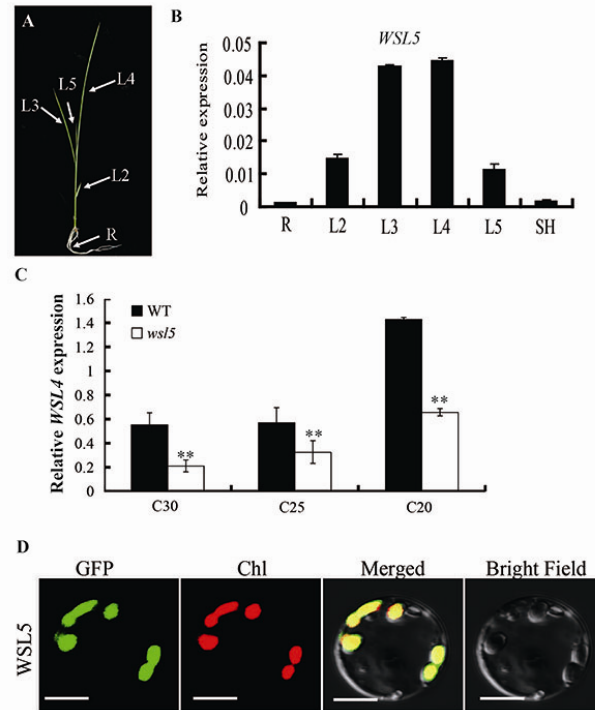

**Fig. 4.** Expression pattern analysis and subcellular localization of WSL5. (A) Schematic of a rice seedling with fully expanded fourth leaf. (B) qRT-PCR analysis *WSL5* expression in roots, stems, L2, L3, L4, L5 and sheaths of wild type. (C) qRT-PCR analyses of *WSL5* transcript in WT and *wsl5* mutant seedlings grown in a growth chamber with a 12 h photoperiod at 30, 25, and 20°C. (D) Localization of WSL5 protein in rice protoplasts. Green fluorescence shows GFP, red fluorescence shows chlorophyll, orange indicates the two types of fluorescence merged. Error bars represent the SD from three independent experiments. (Student's t-test, \*\* $P < 0.01$ ).

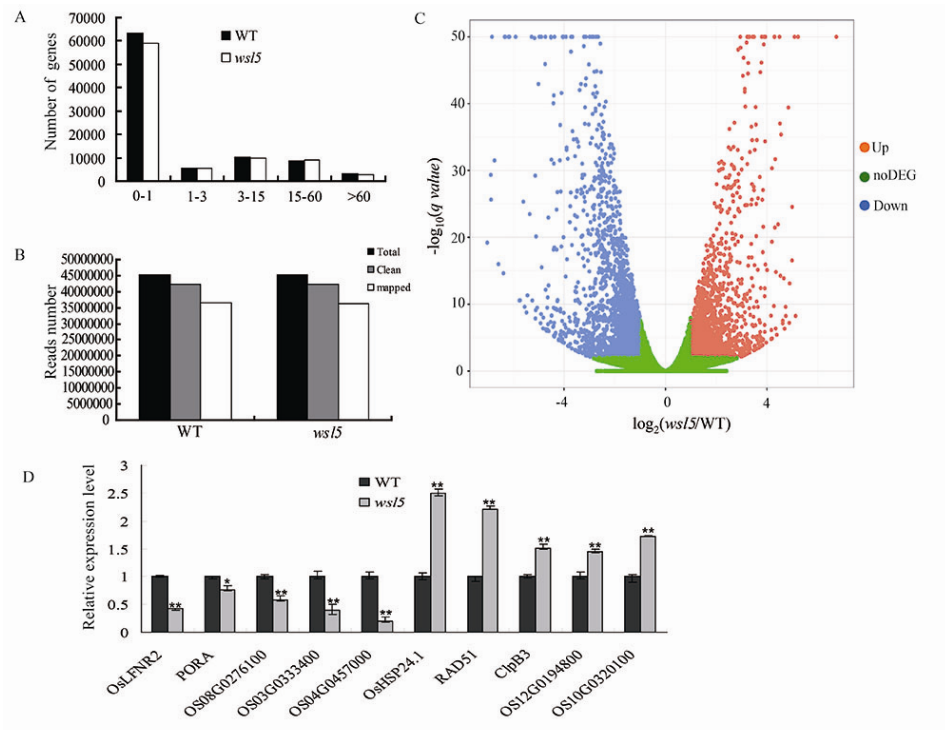

**Fig. 5.** RNA-seq analysis of wild-type and *ws15* seedlings. mRNA was enriched from total RNA from 10-d-old (third leaf) seedlings of wild type and *ws15* using oligo-(dT). cDNA was synthesized using random hexamer primers and reverse-transcribed using random hexamer primers. The library was then constructed and sequenced using an Illumina HiSEquation 2000. (A) Frequencies of detected genes sorted according to expression levels. (B) Read numbers of wild-type and *ws15* sequences. (C) Volcano plot showing the overall alterations in gene expression in wild type and *ws15*. (D) qRT-PCR of genes differentially expressed in RNA-seq. Five up-regulated and 5 down-regulated genes were tested. Error bars represent the SD from three independent experiments. (Student's t-test, \* $P < 0.05$ , \*\* $P < 0.01$ ).

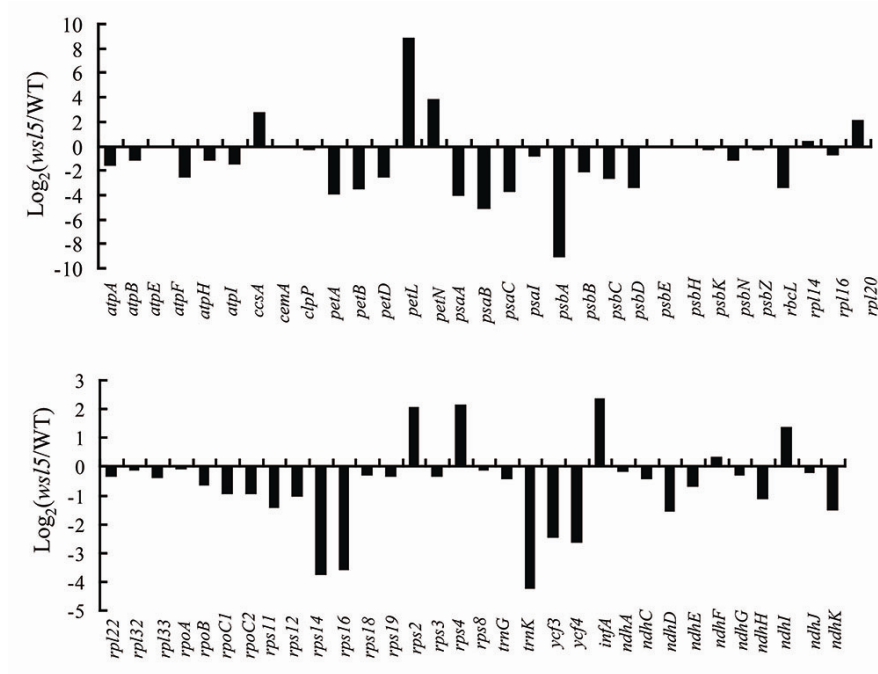

**Fig. 6.** Differential expression of plastid-encoded genes in wild type and *ws15*. mRNA enriched from total RNA isolated from 10-d-old seedlings of wild type and *ws15* was fragmented and reverse-transcribed using random hexamer primers. The library was then constructed and sequenced using an Illumina HiSEquation 2000. The graph shows the  $\log_2$  ratio of transcript levels in *ws15* mutants compared with wild type.

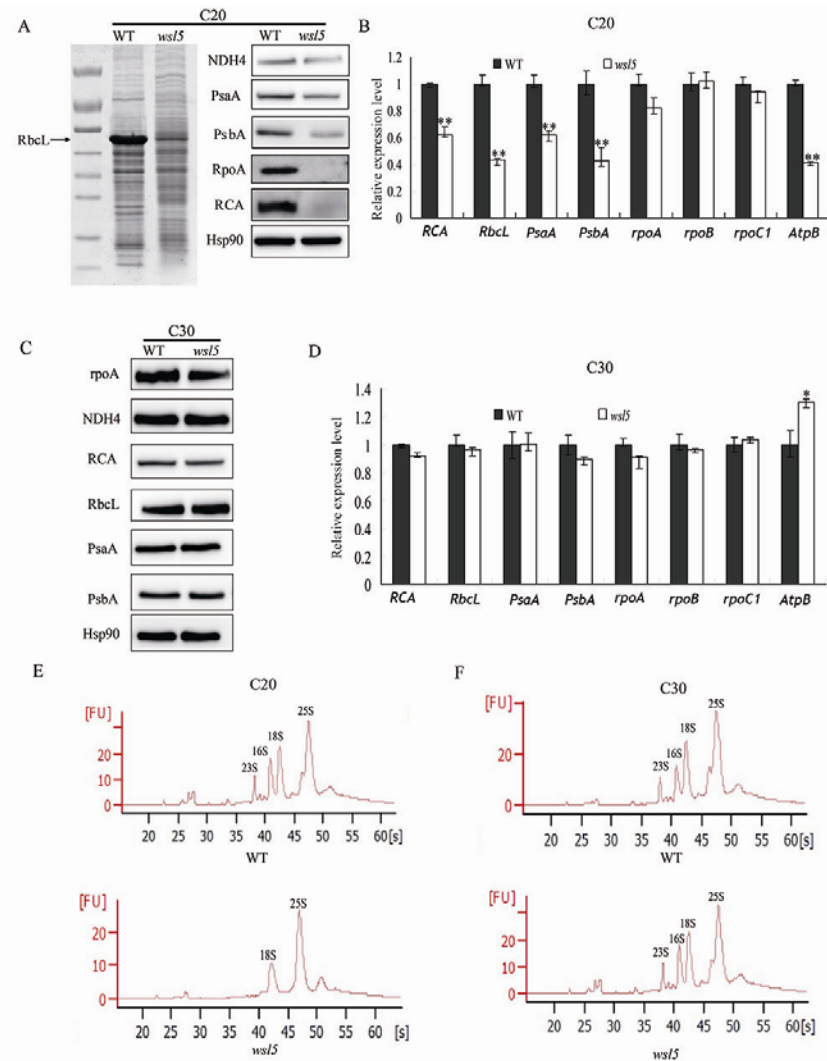

**Fig. 7.** Analysis of accumulation of transcripts and proteins of representative genes associated with chloroplast biogenesis in WT and *ws15* seedlings. (A, C) Western blot analysis of chloroplast proteins and RCA in wild-type and *ws15* mutant seedlings at the third-leaf stage at C20 (A) and C30 (C). Hsp90 was used as an internal control. (B, D) qRT-PCR analysis of relative expression levels of plastidic encoding genes in wild type and *ws15* at the third-leaf stage under (B) C20 or (D) C30. Error bars represent SD from three independent experiments. (E-F) rRNA analysis using an Agilent 2100 bioanalyzer. RNA was isolated from 10-d-old wild-type seedlings and *ws15* seedlings grown in C30 and C20. (Student's t-test, \*\* $P < 0.01$ ).

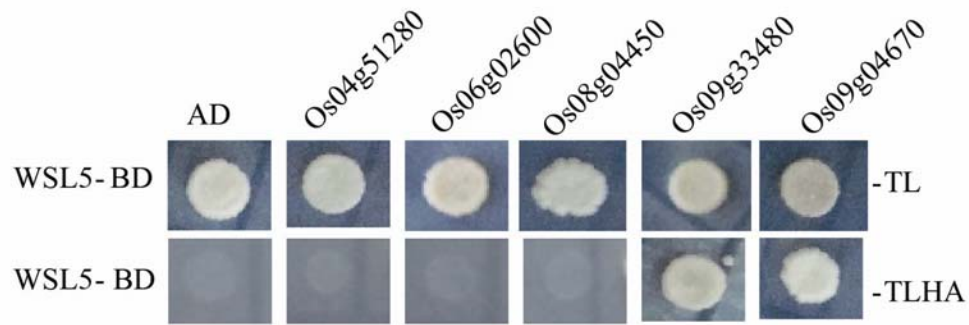

**Fig. 8.** Yeast two-hybrid assay of WSL5 and MORF families. WSL5 was fused to the pGBKT7 vector (WSL5-BD). MORF protein was fused to the pGADT7 vector. LT, control medium (SD–Leu/–Trp); LTHA, selective medium (SD–Leu/–Trp/–His/–Ade). Empty pGBKT7 and pGAD-T7 vectors served as negative controls.

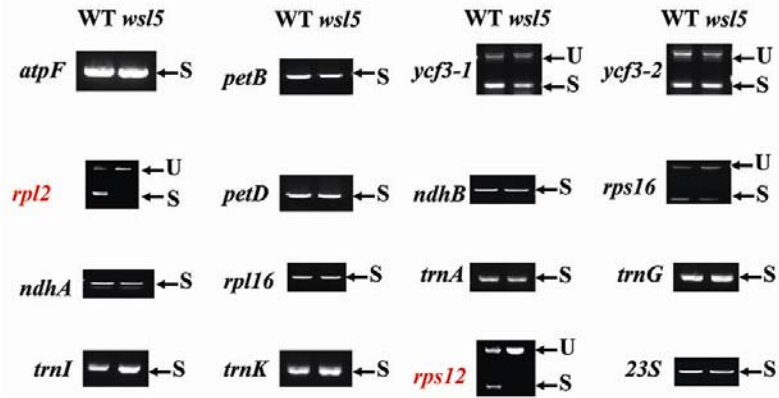

**Fig. 9.** Splicing analyses of chloroplast transcripts in WT and *wsl5* mutant. Gene transcripts are labeled at the left. Spliced (S) and unspliced (U) transcripts are shown at the right. RNA was extracted from WT and *wsl5* mutant seedlings.

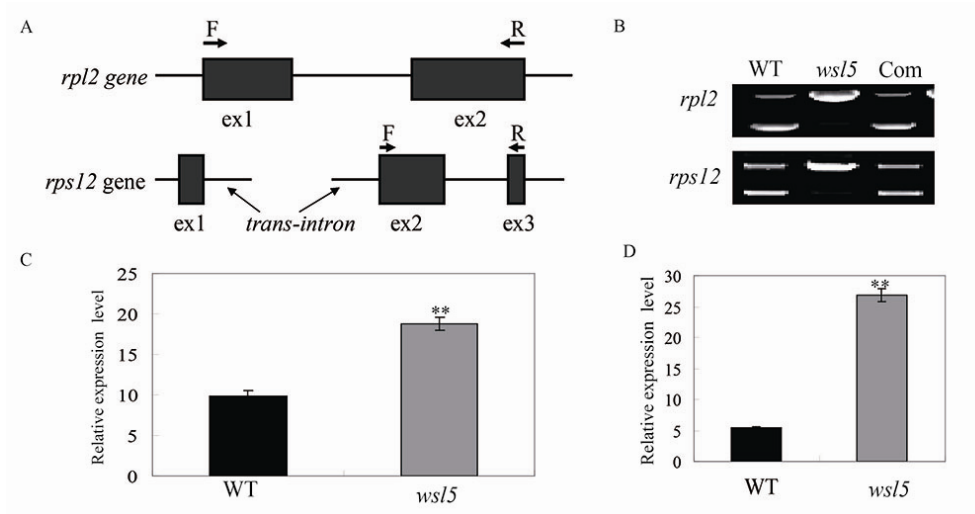

**Fig. 10.** Splicing analyses of two chloroplast group II introns in WT and *ws15* mutant. (A) Sketch map of *rpl2* and *rps12* transcripts. (B) RT-PCR analyses of *rpl2* and *rps12* transcripts in WT and *ws15* mutant. (C-D) Quantitative RT-PCR analyses of *rpl2* and *rps12* transcripts in WT and *ws15* mutant seedlings. Data are means  $\pm$  SD of three repeats. Student's t-test: \*\* $P < 0.01$ .



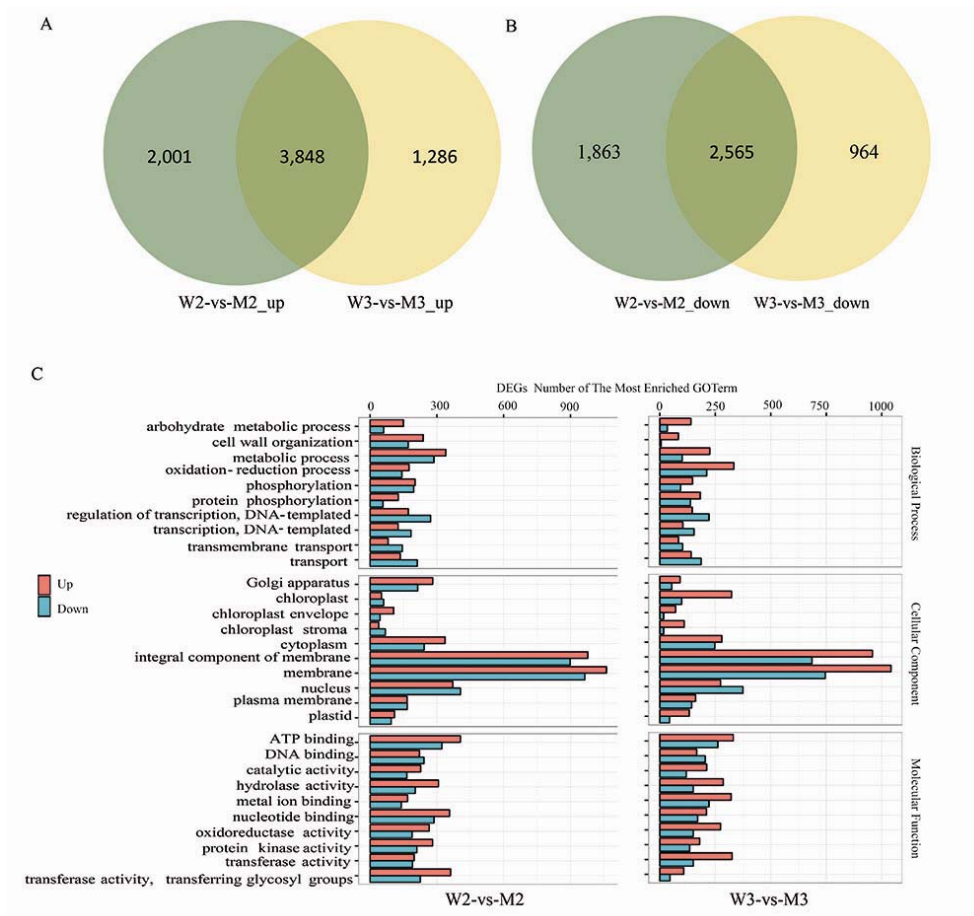

**Fig. 11.** RNA-seq analysis of wild type and *ws15* under low temperature and normal conditions. (A) Up-regulated differentially expressed genes comparing W2 and M2 and W3 and M3. (B) Down-regulated differentially expressed genes between W2-vs-M2 and W3-vs-M3. (C) Go analysis of genes differentially expressed between W2 and M2 and W3 and M3. W3 and W2 represent wild type plants grown at 30°C and 20°C, respectively. M3 and M2 represent *ws15* plants grown at 30°C and 20°C, respectively.
